# Supplementary material for: Adjusted morbidity groups and survival: a retrospective cohort study of primary care patients with chronic conditions
Source: Springer Nature journal article supplement (doi:10.1186/s12875-023-02059-9), 2023-04-20
Supplement: MOESM1 [file 25264312]

# **TITLE PAGE**

## **TITLE:**

Adjusted morbidity groups and survival: A retrospective cohort study of primary care patients with chronic conditions.

## **AUTHORS:**

Mariana Bandeira-de Oliveira<sup>1</sup>, Teresa Aparicio-González<sup>2</sup>, Isabel del Cura-González<sup>3,4,5</sup>, Carmen Suárez-Fernández<sup>6,7</sup>, Ricardo Rodríguez-Barrientos<sup>3</sup>, Jaime Barrio-Cortes<sup>3,8,9\*</sup>

1. Ciudad Jardin Health Centre, Primary Care Management, Madrid, Spain.
2. Goya Health Centre, Primary Care Management, Madrid, Spain.
3. Research Unit. Primary Care Management, Madrid, Spain.
4. Network for Research in Health Services in Chronic Diseases (REDISSEC), Madrid, Spain.
5. Department of Medical Specialties and Public Health, Rey Juan Carlos University, Madrid, Spain.
6. University Hospital of La Princesa, Madrid, Spain.
7. Department of Medicine, Autonomous University of Madrid, Madrid, Spain.
8. Foundation for Biosanitary Research and Innovation in Primary Care, Madrid, Spain.
9. Camilo José Cela University, Madrid, Spain.

## **\* CORRESPONDING AUTHOR:**

Jaime Barrio-Cortes.

Email: [jaime.barrio@salud.madrid.org](mailto:jaime.barrio@salud.madrid.org)

Telephone: 660117699

**Additional file 1. Types of chronic conditions considered by the Adjusted Morbidity Group (AMG) in the Community of Madrid at the time of data extraction**

|                                                 |
|-------------------------------------------------|
| Alcohol abuse                                   |
| Anaemia                                         |
| Aorta aneurysm                                  |
| Anxiety                                         |
| Arthritis                                       |
| Arthrosis                                       |
| Asthma                                          |
| Attention-Deficit/Hyperactivity Disorder (ADHD) |
| Bladder cancer                                  |
| Breast cancer                                   |
| Cardiopulmonary disease                         |
| Central nervous system cancer                   |
| Cervical cancer                                 |
| Cirrhosis                                       |
| Colon cancer                                    |
| Dementia                                        |
| Depression                                      |
| Diabetes Mellitus                               |
| Dyslipidaemia                                   |
| Dysrhythmias                                    |
| Ear, nose and throat cancer                     |
| Endometrial cancer                              |
| Epilepsy                                        |
| Gastrointestinal ulcer                          |
| Glaucoma                                        |
| Heart chronic failure                           |
| Hepatoblastoma                                  |
| Hodgkin/Other lymphomas                         |

|                                              |
|----------------------------------------------|
| Human immunodeficiency virus (HIV)           |
| Hyperlipidemia                               |
| Hypertension                                 |
| Ischemic heart disease                       |
| Leukemia                                     |
| Liver cancer                                 |
| Lung cancer                                  |
| Mental retardation                           |
| Multiple sclerosis                           |
| Obesity                                      |
| Obstructive chronic pulmonary disease (OCPD) |
| Osteoarthritis                               |
| Osteoporosis                                 |
| Pancreatic cancer                            |
| Parkinson                                    |
| Prostate cancer                              |
| Renal cancer                                 |
| Renal chronic failure                        |
| Retinoblastoma                               |
| Schizophrenia                                |
| Skin cancer                                  |
| Soft tissues cancer                          |
| Stomach cancer                               |
| Stroke                                       |
| Substance abuse                              |
| Testicle cancer                              |
| Thyroid cancer                               |
| Thyroid disorder                             |
| Ulcerative colitis                           |
| Valvular heart disease                       |
| Vasculitis                                   |

**Additional file 2. Sociodemographic, clinician and care characteristics of the surviving and deceased patients with chronic conditions, segmented by sex.**

| Variables n (%)             |        | Survivors<br>9,389 (95.2) |                      |                      | Non-survivors<br>477 (4.8) |                    |                      |
|-----------------------------|--------|---------------------------|----------------------|----------------------|----------------------------|--------------------|----------------------|
|                             |        | Female<br>5,783 (61.6)    | Male<br>3,606 (38.4) | p-value <sup>a</sup> | Female<br>273 (57.2)       | Male<br>204 (42.8) | p-value <sup>b</sup> |
| Risk Level                  | Low    | 4,556 (78.8)              | 2,903 (80.5)         |                      | 109 (39.9)                 | 70 (34.3)          |                      |
|                             | Medium | 1,053 (18.2)              | 565 (15.7)           | <0.01                | 106 (38.8)                 | 60 (29.4)          | <0.01                |
|                             | High   | 174 (3.0)                 | 138 (3.8)            |                      | 58 (21.2)                  | 74 (36.3)          |                      |
| Age *                       |        | 56 (20.2)                 | 52.3 (20.2)          | <0.01                | 82.2 (15.5)                | 74.1 (17.3)        | <0.01                |
| Immobilized                 |        | 138 (2.4)                 | 34 (0.9)             | <0.01                | 85 (31.1)                  | 43 (21.1)          | 0.01                 |
| Institutionalized           |        | 74 (1.3)                  | 22 (0.6)             | <0.01                | 48 (17.6)                  | 17 (8.3)           | <0.01                |
| Primary caregiver           |        | 107 (1.9)                 | 28 (0.8)             | <0.01                | 57 (20.9)                  | 37 (18.1)          | 0.46                 |
| Home support                |        | 44 (0.8)                  | 10 (0.3)             | <0.01                | 14 (5.1)                   | 12 (5.9)           | 0.72                 |
| Palliative care             |        | 9 (0.2)                   | 6 (0.2)              | 0.90                 | 11 (4.0)                   | 18 (8.8)           | 0.03                 |
| Complexity index *          |        | 6.3 (0.1)                 | 6.1 (0.1)            | 0.03                 | 14.5 (12.6)                | 18.7 (17.1)        | <0.01                |
| No. of chronic diseases *   |        | 2.5 (0.0)                 | 2.3 (0.0)            | <0.01                | 4.3 (2.5)                  | 4.2 (2.6)          | 0.71                 |
| Multimorbidity              |        | 3,588 (62)                | 2,033 (56.4)         | <0.01                | 243 (89)                   | 172 (84.3)         | 0.13                 |
| Arterial hypertension       |        | 1,795 (31)                | 1,290 (35.8)         | <0.01                | 203 (74.4)                 | 130 (63.7)         | 0.01                 |
| Chronic heart failure       |        | 96 (1.7)                  | 61 (1.7)             | 0.91                 | 55 (20.1)                  | 28 (13.7)          | 0.07                 |
| Chronic renal insufficiency |        | 48 (0.8)                  | 44 (1.2)             | 0.07                 | 22 (8.1)                   | 28 (13.7)          | 0.05                 |
| Cirrhosis                   |        | 228 (3.9)                 | 228 (6.3)            | <0.01                | 13 (4.8)                   | 10 (4.9)           | 0.94                 |
| COPD                        |        | 146 (2.5)                 | 180 (5)              | <0.01                | 22 (8.1)                   | 41 (20.1)          | <0.01                |
| Dementia                    |        | 111 (1.9)                 | 29 (0.8)             | <0.01                | 51 (18.7)                  | 22 (10.8)          | 0.02                 |
| Depression                  |        | 893 (15.4)                | 272 (7.5)            | <0.01                | 64 (23.4)                  | 22 (10.8)          | <0.01                |
| Diabetes Mellitus           |        | 491 (8.5)                 | 463 (12.8)           | <0.01                | 55 (20.1)                  | 54 (26.5)          | 0.11                 |
| Ischaemic heart disease     |        | 115 (2.0)                 | 189 (5.2)            | <0.01                | 22 (8.1)                   | 44 (21.6)          | <0.01                |
| Neoplasia                   |        | 204 (3.5)                 | 184 (5.1)            | <0.01                | 45 (16.5)                  | 48 (23.5)          | 0.06                 |
| Obesity                     |        | 914 (15.8)                | 644 (17.9)           | 0.01                 | 41 (15)                    | 27 (13.2)          | 0.58                 |
| Stroke                      |        | 124 (2.1)                 | 92 (2.6)             | 0.20                 | 23 (16.5)                  | 28 (15.7)          | 0.07                 |
| Polymedicated               |        | 917 (15.9)                | 389 (10.8)           | <0.01                | 184 (67.4)                 | 108 (52.9)         | <0.01                |

\* $\bar{X}$  (SD). COPD: chronic obstructive pulmonary disease. <sup>a</sup> p-value is the differences between male and female based on the bivariate analysis.

**Additional file 3. Sociodemographic, clinician and care characteristics of surviving and deceased patients with chronic conditions, segmented by risk level.**

| Variables<br>n (%)          | Survivors<br>9,389 (95.2%) |                             |                         |                          | Nonsurvivors<br>477 (4.8%) |                          |                         |                          |
|-----------------------------|----------------------------|-----------------------------|-------------------------|--------------------------|----------------------------|--------------------------|-------------------------|--------------------------|
|                             | Low risk<br>7,459 (97.7)   | Medium risk<br>1,618 (90.7) | High risk<br>312 (70.3) | p-<br>value <sup>a</sup> | Low risk<br>179 (2.3)      | Medium risk<br>166 (9.3) | High risk<br>132 (29.7) | p-<br>value <sup>a</sup> |
| Female sex                  | 4,556 (61.1)               | 1,053 (65.1)                | 174 (55.8)              | <0.01                    | 109 (60.9)                 | 106 (63.9)               | 58 (43.9)               | <0.01                    |
| Age *                       | 50.1 (19.1)                | 70.9 (15)                   | 75.9 (12.9)             | <0.01                    | 70.8 (21.2)                | 84.5 (9.9)               | 82.1 (11.9)             | <0.01                    |
| Immobilized                 | 33 (0.4)                   | 82 (5.1)                    | 57 (18.3.3)             | <0.01                    | 16 (8.9)                   | 44 (26.5)                | 68 (51.5)               | <0.01                    |
| Institutionalized           | 44 (0.6)                   | 32 (2)                      | 20 (6.4)                | <0.01                    | 23 (12.8)                  | 20 (12)                  | 22 (16.7)               | 0.5                      |
| Primary caregiver           | 19 (0.3)                   | 67 (4.1)                    | 49 (15.7)               | <0.01                    | 7 (3.9)                    | 34 (20.5)                | 53 (40.2)               | <0.01                    |
| Home support                | 13 (0.2)                   | 28 (1.7)                    | 13 (4.2)                | <0.01                    | 0 (0)                      | 10 (6)                   | 16 (12.1)               | <0.01                    |
| Palliative care             | 7 (0.1)                    | 4 (0.2)                     | 4 (1.3)                 | <0.01                    | 1 (0.6)                    | 3 (1.8)                  | 25 (18.9)               | <0.01                    |
| Complexity index *          | 3.9 (2.2)                  | 12.3 (2.6)                  | 28.5 (10.3)             | <0.01                    | 5 (2.3)                    | 13.5 (3.1)               | 34.9 (15.6)             | <0.01                    |
| No. of chronic diseases *   | 1.9 (1.1)                  | 4.3 (1.6)                   | 6.7 (2.4)               | <0.01                    | 2.3 (1.1)                  | 4.4 (1.4)                | 6.9 (2.5)               | <0.01                    |
| Multimorbidity              | 3,753 (50.3)               | 1,558 (96.3)                | 310 (99.4)              | <0.01                    | 122 (68.2)                 | 163 (98.2)               | 130 (98.5)              | <0.01                    |
| Arterial hypertension       | 1,771 (23.7)               | 1,060 (65.5)                | 254 (81.4)              | <0.01                    | 84 (46.9)                  | 139 (83.7)               | 110 (83.3)              | <0.01                    |
| Cirrhosis                   | 238 (3.2)                  | 181 (11.2)                  | 37 (11.9)               | <0.01                    | 3 (1.7)                    | 7 (4.2)                  | 13 (9.8)                | <0.01                    |
| Chronic heart failure       | 12 (0.2)                   | 75 (4.6)                    | 70 (22.4)               | <0.01                    | 4 (2.2)                    | 26 (15.7)                | 53 (40.2)               | <0.01                    |
| Chronic renal insufficiency | 9 (0.1)                    | 28(1.7)                     | 55 (17.6)               | <0.01                    | 0 (0)                      | 8 (4.8)                  | 42 (31.8)               | <0.01                    |
| COPD                        | 110 (1.5)                  | 142 (8.8)                   | 74 (23.7)               | <0.01                    | 5 (2.8)                    | 23 (13.9)                | 35 (26.5)               | <0.01                    |
| Dementia                    | 45 (0.6)                   | 64 (4)                      | 31 (9.9)                | <0.01                    | 19 (10.6)                  | 29 (17.5)                | 25 (18.9)               | <0.01                    |
| Depression                  | 739 (9.9)                  | 355 (21.9)                  | 71 (22.8)               | <0.01                    | 25 (14)                    | 31 (18.7)                | 30 (22.7)               | 0.1                      |
| Diabetes Mellitus           | 420 (5.6)                  | 396 (24.5)                  | 138 (44.2)              | <0.01                    | 22 (12.3)                  | 36 (21.7)                | 51 (38.6)               | <0.01                    |
| Ischaemic heart disease     | 81 (1.1)                   | 149 (9.2)                   | 74 (23.7)               | <0.01                    | 5 (2.8)                    | 24 (14.5)                | 37 (28)                 | <0.01                    |
| Neoplasia                   | 122 (1.6)                  | 157 (9.7)                   | 109 (34.9)              | <0.01                    | 7 (3.9)                    | 28 (16.9)                | 58 (43.9)               | <0.01                    |
| Obesity                     | 1,013 (13.6)               | 448 (2.7)                   | 97 (31.1)               | <0.01                    | 19 (10.6)                  | 15 (9)                   | 34 (25.8)               | <0.01                    |
| Stroke                      | 57 (0.8)                   | 98 (6.1)                    | 61 (19.6)               | <0.01                    | 5 (2.8)                    | 15 (9)                   | 31 (23.5)               | <0.01                    |
| Polymedicated               | 413 (5.5)                  | 652 (40.3)                  | 241 (77.2)              | <0.01                    | 60 (33.5)                  | 122 (73.5)               | 110 (83.3)              | <0.01                    |

\* $\bar{X}$  (DE). COPD - chronic obstructive pulmonary disease. <sup>a</sup> p-value is the differences between risk levels based on bivariate analysis.
